# Supplementary material for: Synthesis, characterization and biological activity of new cyclometallated platinum(iv) complexes containing a para-tolyl ligand
Source: Royal Society of Chemistry journal article supplement (doi:10.1039/c8dt01124a), 2018-01-01

## SUPPORTING INFORMATION

### Synthesis, characterization and biological activity of new cyclometallated platinum(IV) complexes containing a *para*-tolyl ligand

Mònica Solé,<sup>a,‡</sup> Cristina Balcells,<sup>b,c,‡</sup> Margarita Crespo,<sup>a,c,\*</sup> Josefina Quirante,<sup>c,d,\*</sup> Josefa Badia,<sup>c,e</sup> Laura Baldomà,<sup>c,e</sup> Mercè Font-Bardia,<sup>f</sup> Marta Cascante.<sup>b,c,g</sup>

<sup>a</sup> *Departament de Química Inorgànica i Orgànica, Secció de Química Inorgànica, Facultat de Química, Universitat de Barcelona, Diagonal 645, 08028-Barcelona, Spain.*

<sup>b</sup> *Department of Biochemistry and Molecular Biomedicine, Faculty of Biology, Universitat de Barcelona, Av. Diagonal 643, 08028-Barcelona, Spain.*

<sup>c</sup> *Institut de Biomedicina de la Universitat de Barcelona (IBUB). Av. Diagonal 643, 08028-Barcelona, Spain.*

<sup>d</sup> *Laboratori de Química Orgànica, Facultat de Farmàcia, Universitat de Barcelona, Av. Joan XXIII, 27-31, 08028-Barcelona, Spain.*

<sup>e</sup> *Departament de Bioquímica i Fisiologia, Secció de Bioquímica i Biologia Molecular, Facultat de Farmàcia, Av. Joan XXIII, 27-31, 08028-Barcelona, Spain.*

<sup>f</sup> *Unitat de Difracció de RX, Centres Científics i Tecnològics de la Universitat de Barcelona (CCiTUB), Universitat de Barcelona, Solé i Sabarís 1-3, 08028-Barcelona, Spain.*

<sup>g</sup> *Centro de Investigación Biomédica en Red de Enfermedades Hepáticas y digestivas (CIBEREHD), Instituto de Salud Carlos III (ISCHIII), Madrid, Spain.*

<sup>‡</sup> *These authors contributed equally to this work.*

<sup>\*</sup> *Corresponding authors: Margarita Crespo (E-mail: [margarita.crespo@qi.ub.es](mailto:margarita.crespo@qi.ub.es)); Josefina Quirante (E-mail: [quirantese@ub.edu](mailto:quirantese@ub.edu)).*

**Figure S1.**  $^1\text{H}$ -NMR spectrum of a solution of complex **cm1MeI** (1 mM) in 50 mM phosphate buffer (in  $\text{D}_2\text{O}$ , pH 7.40) and  $\text{d}^6$ -DMSO freshly prepared and after 3 h, 24 h and 1 week of storage at 298 K.

**Figure S2.**  $^1\text{H}$ -NMR spectrum of a solution of complex **cm1MeI** (1 mM) in 50 mM phosphate buffer (in  $\text{D}_2\text{O}$ , pH 7.40) and  $\text{d}^6$ -DMSO containing 25 mM ascorbic acid, freshly prepared and after 3 h, 24 h and 1 week of storage at 298 K.

**Figure S3.**  $^1\text{H}$ -NMR spectrum of a solution of complex **cm1MeI** (1 mM) in 50 mM phosphate buffer (in  $\text{D}_2\text{O}$ , pH 7.40) and  $\text{d}^6$ -DMSO containing 25 mM GSH, freshly prepared and after 3 h, 24 h and 1 week of storage at 298 K.

**Figure S4.**  $^1\text{H}$ -NMR spectrum of a solution of complex **cm1MeI** (1 mM) in 50 mM phosphate buffer (in  $\text{D}_2\text{O}$ , pH 7.40) and  $\text{d}^6$ -DMSO containing 25 mM L-cysteine, freshly prepared and after 24 h and 1 week of storage at 298 K.

**Figure S1.**  $^1\text{H-NMR}$  spectrum of a solution of complex **cm1MeI** (1 mM) in 50 mM phosphate buffer (in  $\text{D}_2\text{O}$ , pH 7.40) and  $\text{d}^6\text{-DMSO}$ , freshly prepared and after 3 h, 24 h and 1 week of storage at 298 K.

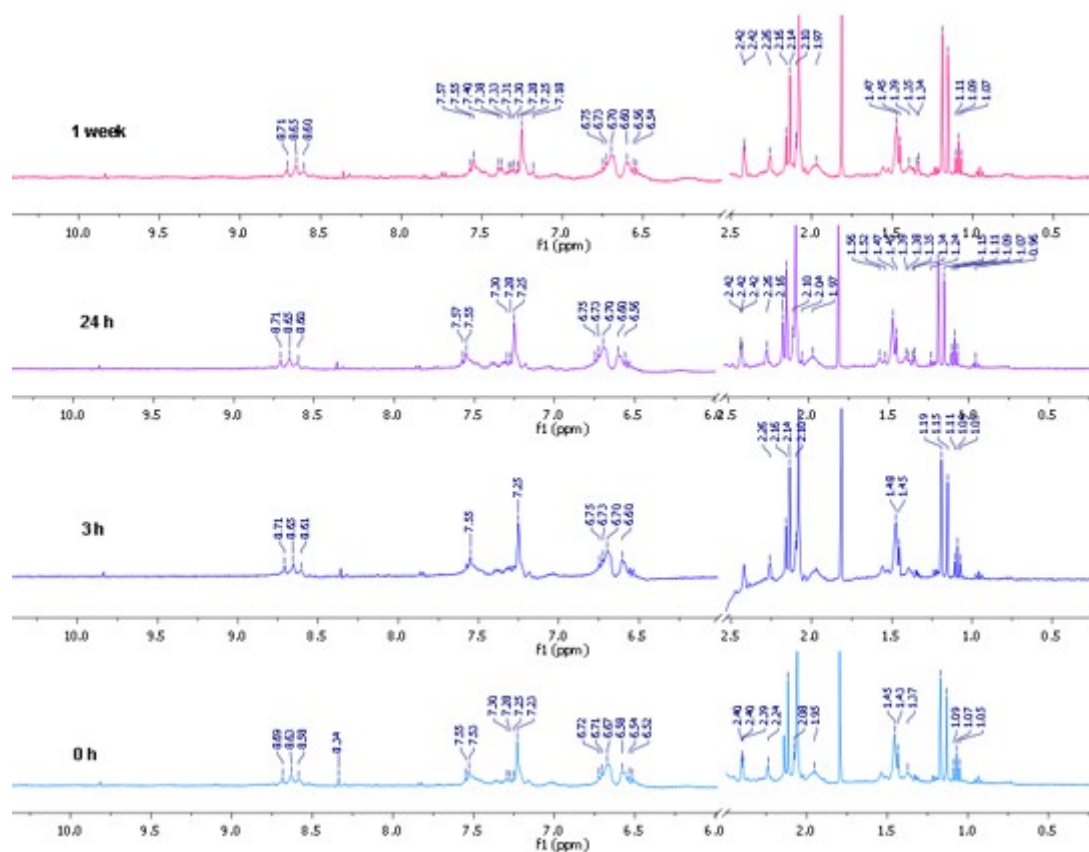

**Figure S2.**  $^1\text{H-NMR}$  spectrum of a solution of complex **cm1MeI** (1 mM) in 50 mM phosphate buffer (in  $\text{D}_2\text{O}$ , pH 7.40) and  $\text{d}^6\text{-DMSO}$  containing 25 mM ascorbic acid, freshly prepared and after 3 h, 24 h and 1 week of storage at 298 K.

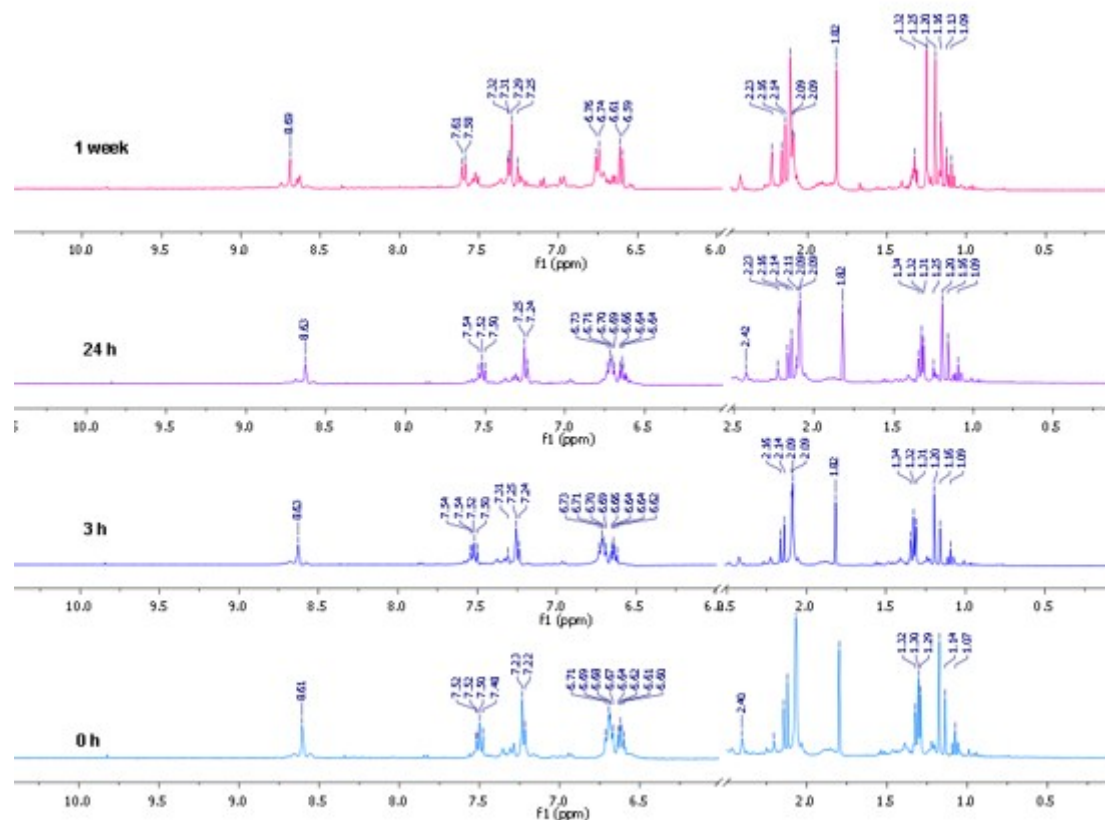

**Figure S3.**  $^1\text{H}$ -NMR spectrum of a solution of complex **cm1MeI** (1 mM) in 50 mM phosphate buffer (in  $\text{D}_2\text{O}$ , pH 7.40) and  $\text{d}^6$ -DMSO containing 25 mM GSH, freshly prepared and after 3 h, 24 h and 1 week of storage at 298 K.

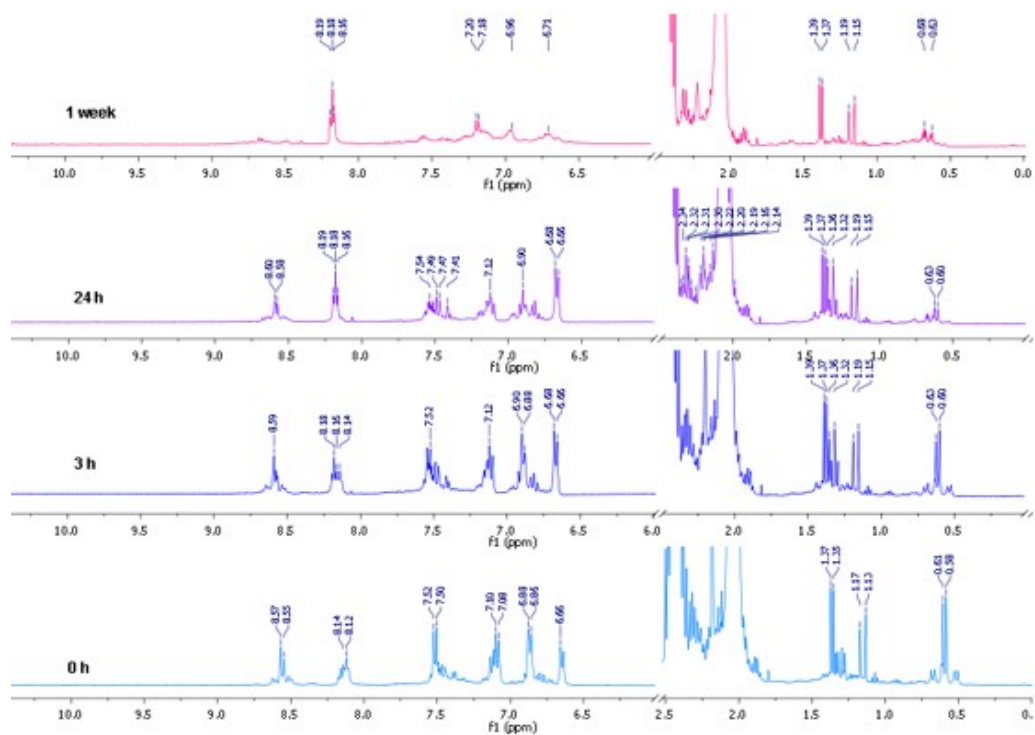

**Figure S4.** Partial view of  $^1\text{H}$ -NMR spectrum of a solution of complex **cm1MeI** (1 mM) in 50 mM phosphate buffer (in  $\text{D}_2\text{O}$ , pH 7.40) and  $\text{d}^6$ -DMSO containing 25 mM L-cysteine, freshly prepared and after 24 h and 1 week of storage at 298 K.

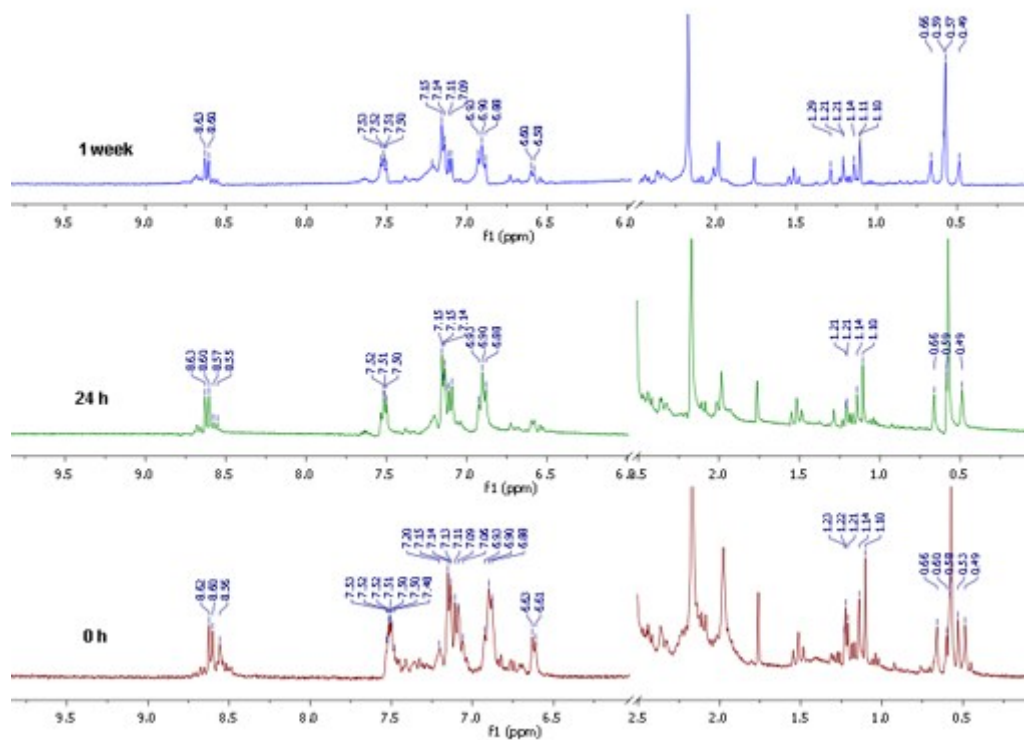

Supplement: c8dt01124a1.pdf [file c8dt01124a1.pdf]
